# Supplementary material
Source: PubMed Central journal article supplement (PMC9976611)
Supplement: ehp11721.s001.acco.pdf [file ehp11721.s001.acco.pdf]

**Note to readers with disabilities:** *EHP* strives to ensure that all journal content is accessible to all readers. However, some figures and Supplemental Material published in *EHP* articles may not conform to [508 standards](#) due to the complexity of the information being presented. If you need assistance accessing journal content, please contact [ehp508@niehs.nih.gov](mailto:ehp508@niehs.nih.gov). Our staff will work with you to assess and meet your accessibility needs within 3 working days.

### **Supplemental Material**

#### **Association of Lifetime Exposure to Glyphosate and Aminomethylphosphonic Acid (AMPA) with Liver Inflammation and Metabolic Syndrome at Young Adulthood: Findings from the CHAMACOS Study**

Brenda Eskenazi, Robert B. Gunier, Stephen Rauch, Katherine Kogut, Emily R. Perito, Xenia Mendez, Charles Limbach, Nina Holland, Asa Bradman, Kim G. Harley, Paul J. Mills, and Ana M. Mora

#### **Table of Contents**

**Table S1.** Wet-weight, specific gravity-corrected, and creatinine-adjusted urinary glyphosate and AMPA concentrations in maternal urine at 26-weeks' gestation and child urine at 5-, 14-, and 18-year visits, CHAMACOS study participants.

**Table S2.** Chi-square tests for differences in detection frequencies of glyphosate and AMPA concentrations measured in urine samples collected from the mother during pregnancy and from the child at 5, 14, and 18 years, CHAMACOS participants in case-control group.

**Table S3.** Correlation matrix and p-values of maternal and child urinary concentrations of glyphosate and AMPA, and PUR data from birth to 5 years, CHAMACOS study.

**Table S4.** Associations of measures of food consumption with urinary glyphosate, AMPA, and glyphosate residue concentrations in maternal and child urine, CHAMACOS study.

**Table S5.** Agricultural use of glyphosate in Monterey County, California, 2000-2018.

**Table S6.** Unadjusted RRs and 95% CI for two-fold increases in child urinary glyphosate, AMPA, and glyphosate residue concentrations (specific gravity-corrected,  $\mu\text{g/L}$ ) and abnormal markers of liver inflammation and metabolic syndrome (and its components) in CHAMACOS young adults in case-control group.

**Table S7.** Adjusted RRs and 95% CI for two-fold increases in child urinary glyphosate, AMPA, and glyphosate residue concentrations (specific gravity-corrected,  $\mu\text{g/L}$ ) at 18 years and abnormal markers of liver inflammation and metabolic syndrome (and its components) in CHAMACOS young adults in case-control group (n=120-121).

**Table S8.** Adjusted RRs and 95% CI for two-fold increases in child urinary glyphosate, AMPA, and glyphosate residue concentrations (specific gravity-corrected,  $\mu\text{g/L}$ ) and abnormal liver enzymes and metabolic syndrome (and its components) in CHAMACOS young adults in the case-control group, excluding those cases with actin smooth muscle antibody or ceruloplasmin outside of normal limits, or who reported binge drinking in the past 30 days.

**Table S9.** Overall p-values for visit X exposure interaction terms in multiple informant models for repeated child urinary glyphosate, AMPA, and glyphosate residue concentrations (specific gravity-corrected,  $\mu\text{g/L}$ ) at the 5-year, 14-year, and 18-year visits and abnormal markers of liver inflammation and metabolic syndrome (and its components), using mixed-effects Poisson models with a random intercept for each CHAMACOS participant.

**Table S10.** Mediation analysis of child body mass (at age 14 years) on the adjusted associations (RR and 95% CI) for two-fold increases in child (ages 14 and 18 years) urinary concentrations (specific gravity-corrected) of **A.** AMPA and **B.** glyphosate residues and abnormal liver enzymes and metabolic syndrome (and its components) in CHAMACOS young adult cases and controls.

**Table S11.** Unadjusted RRs and 95% CI for living within 1-km of agricultural glyphosate use during maternal pregnancy (any use) and from birth to age 5 years (all use, kg,  $\log_2$ ) based on Pesticide Use Reporting data and abnormal liver enzymes or metabolic syndrome (and its components) among all CHAMACOS young adult participants and in the case-control subset.

**Figure S1.** Flow diagram of participants from the CHAMACOS study.

**Figure S2.** Directed Acyclic Graph of the relationship between urinary glyphosate and AMPA concentrations and risk of elevated liver transaminases and metabolic syndrome (and its components).

**Supplemental Material.** Certificates of INSPQ's participation in the Quebec External Quality Assessment Scheme for Organic Substances in Urine (OSEQAS), German External Quality Assessment Scheme (G-EQUAS), and Human Biomonitoring for Europe (HBM4EU, reference laboratory) program.

**Supplemental Table 1.** Wet-weight, specific gravity-corrected, and creatinine-adjusted urinary glyphosate and AMPA concentrations in maternal urine at 26-weeks' gestation and child urine at 5-, 14-, and 18-year visits, CHAMACOS study participants.<sup>a</sup>

**GLYPHOSATE**  
Wet-weight (µg/L)

| Visit                | n   | % detected | GM (GSD)    | Min  | 10%  | 25%  | 50%  | 75%  | 90%  | Max  |
|----------------------|-----|------------|-------------|------|------|------|------|------|------|------|
| <b>Full sample</b>   |     |            |             |      |      |      |      |      |      |      |
| 26 weeks             | 71  | 4.2%       | <LOD        | <LOD | <LOD | <LOD | <LOD | <LOD | <LOD | 0.20 |
| 5 years              | 88  | 35.2%      | <LOD        | <LOD | <LOD | <LOD | <LOD | 0.10 | 0.30 | 2.70 |
| 14 years             | 104 | 78.9%      | 0.18 (2.79) | <LOD | <LOD | 0.09 | 0.20 | 0.38 | 0.62 | 1.90 |
| 18 years             | 121 | 54.6%      | 0.10 (3.22) | <LOD | <LOD | <LOD | 0.10 | 0.20 | 0.40 | 6.40 |
| Fasting              | 48  | 37.5%      | <LOD        | <LOD | <LOD | <LOD | <LOD | 0.10 | 0.32 | 2.20 |
| Non-fasting          | 73  | 65.8%      | 0.12 (3.30) | <LOD | <LOD | <LOD | 0.10 | 0.20 | 0.45 | 6.40 |
| <b>Cases only</b>    |     |            |             |      |      |      |      |      |      |      |
| 26 weeks             | 26  | 3.9%       | <LOD        | <LOD | <LOD | <LOD | <LOD | <LOD | <LOD | 0.20 |
| 5 years              | 32  | 46.9%      | <LOD        | <LOD | <LOD | <LOD | <LOD | 0.10 | 0.30 | 2.70 |
| 14 years             | 46  | 76.1%      | 0.18 (2.92) | <LOD | <LOD | 0.09 | 0.20 | 0.42 | 0.71 | 0.97 |
| 18 years             | 60  | 58.3%      | 0.10 (3.93) | <LOD | <LOD | <LOD | 0.10 | 0.20 | 0.48 | 6.40 |
| Fasting              | 23  | 39.1%      | <LOD        | <LOD | <LOD | <LOD | <LOD | 0.10 | 0.32 | 2.20 |
| Non-fasting          | 37  | 70.3%      | 0.14 (4.11) | <LOD | <LOD | <LOD | 0.10 | 0.32 | 0.92 | 6.40 |
| <b>Controls only</b> |     |            |             |      |      |      |      |      |      |      |
| 26 weeks             | 45  | 4.4%       | <LOD        | <LOD | <LOD | <LOD | <LOD | <LOD | <LOD | 0.20 |
| 5 years              | 56  | 28.6%      | <LOD        | <LOD | <LOD | <LOD | <LOD | 0.10 | 0.30 | 0.86 |
| 14 years             | 58  | 81.0%      | 0.18 (2.71) | <LOD | <LOD | 0.10 | 0.20 | 0.35 | 0.54 | 1.90 |
| 18 years             | 61  | 50.8%      | 0.09 (2.56) | <LOD | <LOD | <LOD | 0.08 | 0.20 | 0.32 | 0.92 |
| Fasting              | 25  | 36.0%      | <LOD        | <LOD | <LOD | <LOD | <LOD | 0.10 | 0.32 | 0.92 |
| Non-fasting          | 36  | 61.1%      | 0.11 (2.51) | <LOD | <LOD | <LOD | 0.10 | 0.20 | 0.40 | 0.65 |

**Specific gravity-corrected (µg/L)**

| <b>Visit</b>         | <b>n</b> | <b>% detected</b> | <b>GM (GSD)</b> | <b>Min</b> | <b>10%</b> | <b>25%</b> | <b>50%</b> | <b>75%</b> | <b>90%</b> | <b>Max</b> |
|----------------------|----------|-------------------|-----------------|------------|------------|------------|------------|------------|------------|------------|
| <b>Full sample</b>   |          |                   |                 |            |            |            |            |            |            |            |
| 26 weeks             | 71       | 4.2%              | <LOD            | <LOD       | <LOD       | <LOD       | <LOD       | <LOD       | <LOD       | 0.62       |
| 5 years              | 88       | 35.2%             | <LOD            | <LOD       | <LOD       | <LOD       | <LOD       | 0.16       | 0.41       | 4.32       |
| 14 years             | 104      | 78.9%             | 0.28 (2.37)     | <LOD       | <LOD       | 0.17       | 0.31       | 0.51       | 0.78       | 1.47       |
| 18 years             | 121      | 54.6%             | 0.16 (2.77)     | <LOD       | <LOD       | <LOD       | 0.14       | 0.31       | 0.48       | 5.91       |
| Fasting              | 48       | 37.5%             | <LOD            | <LOD       | <LOD       | <LOD       | <LOD       | 0.31       | 0.63       | 2.20       |
| Non-fasting          | 73       | 65.8%             | 0.17 (2.80)     | <LOD       | <LOD       | <LOD       | 0.16       | 0.31       | 0.46       | 5.91       |
| <b>Cases only</b>    |          |                   |                 |            |            |            |            |            |            |            |
| 26 weeks             | 26       | 3.9%              | <LOD            | <LOD       | <LOD       | <LOD       | <LOD       | <LOD       | <LOD       | 0.57       |
| 5 years              | 32       | 46.9%             | <LOD            | <LOD       | <LOD       | <LOD       | <LOD       | 0.15       | 0.36       | 4.32       |
| 14 years             | 46       | 76.1%             | 0.30 (2.43)     | <LOD       | <LOD       | 0.17       | 0.36       | 0.56       | 0.78       | 1.36       |
| 18 years             | 60       | 58.3%             | 0.16 (3.24)     | <LOD       | <LOD       | <LOD       | 0.14       | 0.29       | 0.55       | 5.91       |
| Fasting              | 23       | 39.1%             | <LOD            | <LOD       | <LOD       | <LOD       | <LOD       | 0.22       | 0.47       | 2.20       |
| Non-fasting          | 37       | 70.3%             | 0.18 (3.42)     | <LOD       | <LOD       | <LOD       | 0.16       | 0.31       | 0.46       | 5.91       |
| <b>Controls only</b> |          |                   |                 |            |            |            |            |            |            |            |
| 26 weeks             | 45       | 4.4%              | <LOD            | <LOD       | <LOD       | <LOD       | <LOD       | <LOD       | <LOD       | 0.62       |
| 5 years              | 56       | 28.6%             | <LOD            | <LOD       | <LOD       | <LOD       | <LOD       | 0.17       | 0.44       | 2.78       |
| 14 years             | 58       | 81.0%             | 0.27 (2.34)     | <LOD       | <LOD       | 0.18       | 0.30       | 0.48       | 0.80       | 1.47       |
| 18 years             | 61       | 50.8%             | 0.16 (2.33)     | <LOD       | <LOD       | <LOD       | 0.15       | 0.32       | 0.48       | 1.16       |
| Fasting              | 25       | 36.0%             | <LOD            | <LOD       | <LOD       | <LOD       | <LOD       | 0.33       | 0.65       | 1.16       |
| Non-fasting          | 36       | 61.1%             | 0.16 (2.19)     | <LOD       | <LOD       | <LOD       | 0.16       | 0.29       | 0.46       | 0.62       |

**Creatinine-adjusted ( $\mu\text{g/g}$  creatinine)**

| <b>Visit</b>         | <b>n</b> | <b>% detected</b> | <b>GM (GSD)</b> | <b>Min</b> | <b>10%</b> | <b>25%</b> | <b>50%</b> | <b>75%</b> | <b>90%</b> | <b>Max</b> |
|----------------------|----------|-------------------|-----------------|------------|------------|------------|------------|------------|------------|------------|
| <b>Full sample</b>   |          |                   |                 |            |            |            |            |            |            |            |
| 26 weeks             | 71       | 4.2%              | <LOD            | <LOD       | <LOD       | <LOD       | <LOD       | <LOD       | <LOD       | 1.47       |
| 5 years              | 88       | 35.2%             | <LOD            | <LOD       | <LOD       | <LOD       | <LOD       | 0.20       | 0.44       | 3.75       |
| 14 years             | 104      | 78.9%             | 0.19 (2.43)     | <LOD       | <LOD       | 0.12       | 0.19       | 0.35       | 0.54       | 2.13       |
| 18 years             | 121      | 54.6%             | 0.09 (2.63)     | <LOD       | <LOD       | <LOD       | 0.08       | 0.17       | 0.29       | 2.56       |
| Fasting              | 48       | 37.5%             | <LOD            | <LOD       | <LOD       | <LOD       | <LOD       | 0.16       | 0.35       | 1.00       |
| Non-fasting          | 73       | 65.8%             | 0.10 (2.59)     | <LOD       | <LOD       | <LOD       | 0.09       | 0.18       | 0.27       | 2.56       |
| <b>Cases only</b>    |          |                   |                 |            |            |            |            |            |            |            |
| 26 weeks             | 26       | 3.9%              | <LOD            | <LOD       | <LOD       | <LOD       | <LOD       | <LOD       | <LOD       | 1.14       |
| 5 years              | 32       | 46.9%             | <LOD            | <LOD       | <LOD       | <LOD       | <LOD       | 0.21       | 0.39       | 3.75       |
| 14 years             | 46       | 76.1%             | 0.20 (2.45)     | <LOD       | <LOD       | 0.13       | 0.22       | 0.41       | 0.54       | 1.60       |
| 18 years             | 60       | 58.3%             | 0.10 (2.96)     | <LOD       | <LOD       | <LOD       | 0.09       | 0.19       | 0.38       | 2.56       |
| Fasting              | 23       | 39.1%             | <LOD            | <LOD       | <LOD       | <LOD       | <LOD       | 0.12       | 0.35       | 1.00       |
| Non-fasting          | 37       | 70.3%             | 0.11 (3.04)     | <LOD       | <LOD       | <LOD       | 0.09       | 0.20       | 0.42       | 2.56       |
| <b>Controls only</b> |          |                   |                 |            |            |            |            |            |            |            |
| 26 weeks             | 45       | 4.4%              | <LOD            | <LOD       | <LOD       | <LOD       | <LOD       | <LOD       | <LOD       | 1.47       |
| 5 years              | 56       | 28.6%             | <LOD            | <LOD       | <LOD       | <LOD       | <LOD       | 0.20       | 0.44       | 2.15       |
| 14 years             | 58       | 81.0%             | 0.19 (2.43)     | <LOD       | <LOD       | 0.11       | 0.18       | 0.32       | 0.56       | 2.13       |
| 18 years             | 61       | 50.8%             | 0.09 (2.32)     | <LOD       | <LOD       | <LOD       | 0.08       | 0.17       | 0.26       | 0.60       |
| Fasting              | 25       | 36.0%             | <LOD            | <LOD       | <LOD       | <LOD       | <LOD       | 0.16       | 0.34       | 0.60       |
| Non-fasting          | 36       | 61.1%             | 0.09 (2.12)     | <LOD       | <LOD       | <LOD       | 0.09       | 0.17       | 0.20       | 0.30       |

**AMPA**  
**Wet-weight (µg/L)**

| <b>Visit</b>         | <b>n</b> | <b>% detected</b> | <b>GM (GSD)</b> | <b>Min</b> | <b>10%</b> | <b>25%</b> | <b>50%</b> | <b>75%</b> | <b>90%</b> | <b>Max</b> |
|----------------------|----------|-------------------|-----------------|------------|------------|------------|------------|------------|------------|------------|
| <b>Full sample</b>   |          |                   |                 |            |            |            |            |            |            |            |
| 26 weeks             | 71       | 14.1%             | <LOD            | <LOD       | <LOD       | <LOD       | <LOD       | <LOD       | 0.10       | 1.50       |
| 5 years              | 91       | 76.9%             | 0.15 (2.95)     | <LOD       | <LOD       | 0.09       | 0.10       | 0.30       | 0.45       | 3.90       |
| 14 years             | 105      | 93.3%             | 0.45 (2.81)     | <LOD       | 0.10       | 0.20       | 0.47       | 0.93       | 1.40       | 3.70       |
| 18 years             | 121      | 66.9%             | 0.15 (3.10)     | <LOD       | <LOD       | <LOD       | 0.10       | 0.31       | 0.66       | 2.90       |
| Fasting              | 48       | 54.2%             | 0.10 (2.41)     | <LOD       | <LOD       | <LOD       | 0.09       | 0.20       | 0.35       | 0.50       |
| Non-fasting          | 73       | 75.3%             | 0.20 (3.30)     | <LOD       | <LOD       | 0.09       | 0.20       | 0.41       | 1.30       | 2.90       |
| <b>Cases only</b>    |          |                   |                 |            |            |            |            |            |            |            |
| 26 weeks             | 26       | 19.2%             | <LOD            | <LOD       | <LOD       | <LOD       | <LOD       | <LOD       | 0.10       | 1.50       |
| 5 years              | 33       | 81.8%             | 0.22 (3.42)     | <LOD       | <LOD       | 0.09       | 0.20       | 0.42       | 1.30       | 3.30       |
| 14 years             | 47       | 93.6%             | 0.47 (2.89)     | <LOD       | 0.10       | 0.20       | 0.54       | 1.10       | 1.30       | 3.70       |
| 18 years             | 60       | 73.3%             | 0.17 (3.24)     | <LOD       | <LOD       | <LOD       | 0.10       | 0.33       | 1.25       | 2.90       |
| Fasting              | 23       | 60.9%             | 0.09 (2.32)     | <LOD       | <LOD       | <LOD       | 0.09       | 0.10       | 0.30       | 0.48       |
| Non-fasting          | 37       | 81.1%             | 0.25 (3.32)     | <LOD       | <LOD       | 0.10       | 0.20       | 0.44       | 1.50       | 2.90       |
| <b>Controls only</b> |          |                   |                 |            |            |            |            |            |            |            |
| 26 weeks             | 45       | 11.1%             | <LOD            | <LOD       | <LOD       | <LOD       | <LOD       | <LOD       | 0.10       | 0.54       |
| 5 years              | 58       | 74.1%             | 0.12 (2.53)     | <LOD       | <LOD       | <LOD       | 0.10       | 0.20       | 0.36       | 3.90       |
| 14 years             | 58       | 93.1%             | 0.44 (2.77)     | <LOD       | 0.10       | 0.20       | 0.45       | 0.93       | 1.50       | 2.60       |
| 18 years             | 61       | 60.7%             | 0.13 (2.96)     | <LOD       | <LOD       | <LOD       | 0.10       | 0.30       | 0.50       | 2.00       |
| Fasting              | 25       | 48.0%             | <LOD            | <LOD       | <LOD       | <LOD       | <LOD       | 0.20       | 0.35       | 0.50       |
| Non-fasting          | 36       | 69.4%             | 0.16 (3.20)     | <LOD       | <LOD       | <LOD       | 0.10       | 0.38       | 0.68       | 2.00       |

**Specific gravity-corrected (µg/L)**

| <b>Visit</b>         | <b>n</b> | <b>% detected</b> | <b>GM (GSD)</b> | <b>Min</b> | <b>10%</b> | <b>25%</b> | <b>50%</b> | <b>75%</b> | <b>90%</b> | <b>Max</b> |
|----------------------|----------|-------------------|-----------------|------------|------------|------------|------------|------------|------------|------------|
| <b>Full sample</b>   |          |                   |                 |            |            |            |            |            |            |            |
| 26 weeks             | 71       | 14.1%             | <LOD            | <LOD       | <LOD       | <LOD       | <LOD       | <LOD       | 0.57       | 1.71       |
| 5 years              | 91       | 76.9%             | 0.22 (2.53)     | <LOD       | <LOD       | 0.11       | 0.19       | 0.38       | 0.60       | 3.96       |
| 14 years             | 105      | 93.3%             | 0.72 (2.27)     | <LOD       | 0.24       | 0.48       | 0.69       | 1.12       | 1.84       | 6.80       |
| 18 years             | 121      | 66.9%             | 0.25 (2.46)     | <LOD       | <LOD       | <LOD       | 0.23       | 0.42       | 0.68       | 2.32       |
| Fasting              | 48       | 54.2%             | 0.21 (1.94)     | <LOD       | <LOD       | <LOD       | 0.22       | 0.34       | 0.48       | 0.63       |
| Non-fasting          | 73       | 75.3%             | 0.27 (2.76)     | <LOD       | <LOD       | 0.13       | 0.28       | 0.53       | 1.28       | 2.32       |
| <b>Cases only</b>    |          |                   |                 |            |            |            |            |            |            |            |
| 26 weeks             | 26       | 19.2%             | <LOD            | <LOD       | <LOD       | <LOD       | <LOD       | <LOD       | 0.60       | 1.71       |
| 5 years              | 33       | 81.8%             | 0.31 (3.01)     | <LOD       | <LOD       | 0.15       | 0.30       | 0.53       | 1.20       | 3.96       |
| 14 years             | 47       | 93.6%             | 0.78 (2.26)     | <LOD       | 0.32       | 0.53       | 0.72       | 1.07       | 2.60       | 6.80       |
| 18 years             | 60       | 73.3%             | 0.26 (2.61)     | <LOD       | <LOD       | <LOD       | 0.24       | 0.41       | 1.19       | 2.32       |
| Fasting              | 23       | 60.9%             | 0.19 (1.93)     | <LOD       | <LOD       | <LOD       | 0.20       | 0.34       | 0.39       | 0.60       |
| Non-fasting          | 37       | 81.1%             | 0.32 (2.92)     | <LOD       | <LOD       | 0.14       | 0.31       | 0.62       | 1.40       | 2.32       |
| <b>Controls only</b> |          |                   |                 |            |            |            |            |            |            |            |
| 26 weeks             | 45       | 11.1%             | <LOD            | <LOD       | <LOD       | <LOD       | <LOD       | <LOD       | 0.57       | 0.93       |
| 5 years              | 58       | 74.1%             | 0.18 (2.13)     | <LOD       | <LOD       | <LOD       | 0.16       | 0.28       | 0.48       | 2.93       |
| 14 years             | 58       | 93.1%             | 0.67 (2.29)     | <LOD       | 0.20       | 0.40       | 0.66       | 1.24       | 1.84       | 4.80       |
| 18 years             | 61       | 60.7%             | 0.23 (2.31)     | <LOD       | <LOD       | <LOD       | 0.23       | 0.44       | 0.62       | 1.83       |
| Fasting              | 25       | 48.0%             | <LOD            | <LOD       | <LOD       | <LOD       | <LOD       | 0.38       | 0.51       | 0.63       |
| Non-fasting          | 36       | 69.4%             | 0.23 (2.57)     | <LOD       | <LOD       | <LOD       | 0.21       | 0.50       | 0.68       | 1.83       |

**Creatinine-adjusted ( $\mu\text{g/g}$  creatinine)**

| <b>Visit</b>         | <b>n</b> | <b>% detected</b> | <b>GM (GSD)</b> | <b>Min</b> | <b>10%</b> | <b>25%</b> | <b>50%</b> | <b>75%</b> | <b>90%</b> | <b>Max</b> |
|----------------------|----------|-------------------|-----------------|------------|------------|------------|------------|------------|------------|------------|
| <b>Full sample</b>   |          |                   |                 |            |            |            |            |            |            |            |
| 26 weeks             | 71       | 14.1%             | <LOD            | <LOD       | <LOD       | <LOD       | <LOD       | <LOD       | 0.84       | 2.27       |
| 5 years              | 91       | 76.9%             | 0.25 (2.53)     | <LOD       | <LOD       | 0.15       | 0.24       | 0.37       | 0.77       | 4.34       |
| 14 years             | 105      | 93.3%             | 0.49 (2.35)     | <LOD       | 0.18       | 0.28       | 0.48       | 0.79       | 1.38       | 7.73       |
| 18 years             | 121      | 66.9%             | 0.14 (2.30)     | <LOD       | <LOD       | <LOD       | 0.14       | 0.22       | 0.44       | 1.07       |
| Fasting              | 48       | 54.2%             | 0.12 (1.86)     | <LOD       | <LOD       | <LOD       | 0.13       | 0.19       | 0.23       | 0.44       |
| Non-fasting          | 73       | 75.3%             | 0.16 (2.56)     | <LOD       | <LOD       | 0.08       | 0.15       | 0.30       | 0.63       | 1.07       |
| <b>Cases only</b>    |          |                   |                 |            |            |            |            |            |            |            |
| 26 weeks             | 26       | 19.2%             | <LOD            | <LOD       | <LOD       | <LOD       | <LOD       | <LOD       | 1.31       | 2.27       |
| 5 years              | 33       | 81.8%             | 0.37 (3.04)     | <LOD       | <LOD       | 0.18       | 0.37       | 0.58       | 1.60       | 4.34       |
| 14 years             | 47       | 93.6%             | 0.52 (2.28)     | <LOD       | 0.23       | 0.32       | 0.52       | 0.79       | 1.34       | 7.73       |
| 18 years             | 60       | 73.3%             | 0.16 (2.26)     | <LOD       | <LOD       | <LOD       | 0.16       | 0.25       | 0.58       | 1.00       |
| Fasting              | 23       | 60.9%             | 0.12 (1.71)     | <LOD       | <LOD       | <LOD       | 0.14       | 0.18       | 0.20       | 0.34       |
| Non-fasting          | 37       | 81.1%             | 0.19 (2.49)     | <LOD       | <LOD       | 0.10       | 0.19       | 0.34       | 0.72       | 1.00       |
| <b>Controls only</b> |          |                   |                 |            |            |            |            |            |            |            |
| 26 weeks             | 45       | 11.1%             | <LOD            | <LOD       | <LOD       | <LOD       | <LOD       | <LOD       | 0.84       | 1.89       |
| 5 years              | 58       | 74.1%             | 0.20 (2.09)     | <LOD       | <LOD       | <LOD       | 0.19       | 0.31       | 0.41       | 2.60       |
| 14 years             | 58       | 93.1%             | 0.47 (2.42)     | <LOD       | 0.15       | 0.24       | 0.42       | 1.00       | 1.71       | 3.00       |
| 18 years             | 61       | 60.7%             | 0.12 (2.31)     | <LOD       | <LOD       | <LOD       | 0.12       | 0.20       | 0.37       | 1.07       |
| Fasting              | 25       | 48.0%             | <LOD            | <LOD       | <LOD       | <LOD       | <LOD       | 0.20       | 0.28       | 0.44       |
| Non-fasting          | 36       | 69.4%             | 0.13 (2.54)     | <LOD       | <LOD       | <LOD       | 0.12       | 0.25       | 0.46       | 1.07       |

<sup>a</sup>Geometric means and standard deviations were not calculated if fewer than 50% of samples were above the detection limit.



**Supplemental Table 2.** Chi-square tests for differences in detection frequencies of glyphosate and AMPA concentrations measured in urine samples collected from the mother during pregnancy and from the child at 5, 14, and 18 years, CHAMACOS participants in case-control group.

| <b>Visit</b>          | <b>Glyphosate</b>                   |                                        |              | <b>AMPA</b>                         |                                        |              |
|-----------------------|-------------------------------------|----------------------------------------|--------------|-------------------------------------|----------------------------------------|--------------|
|                       | <b>Cases<br/>Detected<br/>n (%)</b> | <b>Controls<br/>Detected<br/>n (%)</b> | <b>p-chi</b> | <b>Cases<br/>Detected<br/>n (%)</b> | <b>Controls<br/>Detected<br/>n (%)</b> | <b>p-chi</b> |
| 26 weeks <sup>a</sup> | 1 (3.9)                             | 2 (4.4)                                | 0.90         | 5 (19.2)                            | 5 (11.1)                               | 0.34         |
| 5 years <sup>a</sup>  | 15 (46.9)                           | 16 (28.6)                              | 0.08         | 27 (81.8)                           | 43 (74.1)                              | 0.40         |
| 14 years <sup>a</sup> | 35 (76.1)                           | 47 (81.0)                              | 0.54         | 44 (93.6)                           | 54 (93.1)                              | 0.92         |
| 18 years              | 35 (58.3)                           | 31 (50.8)                              | 0.41         | 44 (73.3)                           | 37 (60.7)                              | 0.14         |
| Fasting               | 9 (39.1)                            | 9 (36.0)                               | 0.82         | 14 (60.9)                           | 12 (48.0)                              | 0.37         |
| Non-fasting           | 26 (70.3)                           | 22 (61.1)                              | 0.41         | 30 (81.1)                           | 25 (69.4)                              | 0.25         |

<sup>a</sup>All samples from prenatal, 5-year, and 14-year visits were non-fasting.

**Supplemental Table 3.** Correlation matrix and p-values of maternal and child urinary concentrations of glyphosate and AMPA, and PUR data from birth to 5 years, CHAMACOS study.

|                                | <b>PUR<br/>0-5 years</b> | <b>GLY<br/>26 weeks</b> | <b>GLY<br/>5 years</b> | <b>GLY<br/>14 years</b> | <b>GLY<br/>18 years<br/>(all)</b> | <b>GLY<br/>18 years<br/>(non-fasting)</b> | <b>AMPA<br/>26<br/>weeks</b> | <b>AMPA<br/>5 years</b> | <b>AMPA<br/>14 years</b> | <b>AMPA<br/>18 years<br/>(all)</b> | <b>AMPA<br/>18 years<br/>(non-fasting)</b> |
|--------------------------------|--------------------------|-------------------------|------------------------|-------------------------|-----------------------------------|-------------------------------------------|------------------------------|-------------------------|--------------------------|------------------------------------|--------------------------------------------|
|                                | r                        | r                       | r                      | r                       | r                                 | r                                         | r                            | r                       | r                        | r                                  | r                                          |
|                                | (p-value)                | (p-value)               | (p-value)              | (p-value)               | (p-value)                         | (p-value)                                 | (p-value)                    | (p-value)               | (p-value)                | (p-value)                          | (p-value)                                  |
| PUR 0-5 years                  | 1                        |                         |                        |                         |                                   |                                           |                              |                         |                          |                                    |                                            |
| GLY 26 weeks                   | 0.03<br>(0.80)           | 1                       |                        |                         |                                   |                                           |                              |                         |                          |                                    |                                            |
| GLY 5 years                    | -0.007<br>(0.95)         | 0.005<br>(0.97)         | 1                      |                         |                                   |                                           |                              |                         |                          |                                    |                                            |
| GLY 14 years                   | -0.056<br>(0.61)         | 0.107<br>(0.40)         | 0.120<br>(0.30)        | 1                       |                                   |                                           |                              |                         |                          |                                    |                                            |
| GLY 18 years (all)             | 0.021<br>(0.83)          | -0.023<br>(0.85)        | -0.053<br>(0.62)       | 0.023<br>(0.82)         | 1                                 |                                           |                              |                         |                          |                                    |                                            |
| GLY 18 years<br>(non-fasting)  | 0.071<br>(0.58)          | 0.055<br>(0.73)         | 0.353<br>(<0.01)       | -0.071<br>(0.60)        | 1.00<br>(<0.01)                   | 1                                         |                              |                         |                          |                                    |                                            |
| AMPA 26 weeks                  | 0.004<br>(0.97)          | 0.659<br>(<0.01)        | 0.098<br>(0.40)        | 0.140<br>(0.27)         | 0.042<br>(0.73)                   | 0.076<br>(0.63)                           | 1                            |                         |                          |                                    |                                            |
| AMPA 5 years                   | 0.118<br>(0.29)          | 0.140<br>(0.27)         | 0.353<br>(<0.01)       | -0.010<br>(0.93)        | 0.018<br>(0.87)                   | -0.106<br>(0.45)                          | 0.157<br>(0.22)              | 1                       |                          |                                    |                                            |
| AMPA 14 years                  | 0.149<br>(0.16)          | 0.059<br>(0.64)         | -0.096<br>(0.40)       | 0.422<br>(<0.01)        | -0.130<br>(0.20)                  | -0.046<br>(0.73)                          | 0.057<br>(0.66)              | -0.020<br>(0.86)        | 1                        |                                    |                                            |
| AMPA 18 years (all)            | -0.016<br>(0.88)         | 0.175<br>(0.14)         | -0.159<br>(0.14)       | 0.129<br>(0.20)         | 0.522<br>(<0.01)                  | 0.552<br>(<0.01)                          | 0.202<br>(0.09)              | -0.043<br>(0.69)        | 0.081<br>(0.42)          | 1                                  |                                            |
| AMPA 18 years<br>(non-fasting) | -0.098<br>(0.45)         | 0.118<br>(0.45)         | -0.241<br>(0.09)       | 0.035<br>(0.80)         | 0.552<br>(<0.001)                 | 0.552<br>(<0.01)                          | 0.200<br>(0.20)              | -0.053<br>(0.71)        | 0.088<br>(0.51)          | 1.00<br>(<0.01)                    | 1                                          |

**Supplemental Table 4.** Associations of measures of food consumption with urinary glyphosate, AMPA, and glyphosate residue concentrations in maternal and child urine, CHAMACOS study.

|                     | Glyphosate           |                    |                     |                     | AMPA                 |                    |                     |                     | Glyphosate residues <sup>a</sup> |                     |                     |
|---------------------|----------------------|--------------------|---------------------|---------------------|----------------------|--------------------|---------------------|---------------------|----------------------------------|---------------------|---------------------|
|                     | Prenatal<br>% detect | 5 year<br>% detect | 14 year<br>GM ± GSD | 18 year<br>GM ± GSD | Prenatal<br>% detect | 5 year<br>GM ± GSD | 14 year<br>GM ± GSD | 18 year<br>GM ± GSD | 5 year<br>GM ± GSD               | 14 year<br>GM ± GSD | 18 year<br>GM ± GSD |
| Food security       |                      |                    |                     |                     |                      |                    |                     |                     |                                  |                     |                     |
| High/marginal       | N/A                  | 32.7%              | 0.32 ± 2.22         | 0.16 ± 1.89         | N/A                  | 0.21 ± 2.57        | 0.77 ± 2.27         | 0.26 ± 2.59         | 0.45 ± 2.30                      | 1.56 ± 2.10         | 0.59 ± 2.43         |
| Low or very low     |                      | 38.9%              | 0.24 ± 2.56         | 0.18 ± 2.52         |                      | 0.22 ± 2.51        | 0.64 ± 2.27         | 0.23 ± 2.17         | 0.55 ± 2.34                      | 1.29 ± 2.08         | 0.57 ± 2.04         |
| p-value             |                      | 0.55               | 0.09                | 0.53                |                      | 0.86               | 0.24                | 0.52                | 0.28                             | 0.21                | 0.81                |
| Fast food           |                      |                    |                     |                     |                      |                    |                     |                     |                                  |                     |                     |
| <1 time/week        | N/A                  | 36.4%              | 0.36 ± 2.41         | 0.18 ± 2.46         | N/A                  | 0.21 ± 2.40        | 0.85 ± 2.22         | 0.24 ± 2.50         | 0.44 ± 2.15                      | 1.80 ± 1.98         | 0.59 ± 2.19         |
| ≥1 time/week        |                      | 35.2%              | 0.26 ± 2.34         | 0.16 ± 2.91         |                      | 0.22 ± 2.64        | 0.68 ± 2.28         | 0.25 ± 2.46         | 0.52 ± 2.44                      | 1.35 ± 2.11         | 0.58 ± 2.37         |
| p-value             |                      | 0.91               | 0.11                | 0.51                |                      | 0.76               | 0.25                | 0.79                | 0.39                             | 0.10                | 0.95                |
| Total calories      |                      |                    |                     |                     |                      |                    |                     |                     |                                  |                     |                     |
| Below median        | 5.9%                 | 37.8%              | 0.23 ± 2.53         | N/A                 | 14.7%                | 0.19 ± 2.21        | 0.71 ± 2.41         | N/A                 | 0.44 ± 1.92                      | 1.40 ± 2.23         | N/A                 |
| Above median        | 0.0%                 | 32.6%              | 0.33 ± 2.05         |                     | 14.7%                | 0.25 ± 2.82        | 0.69 ± 2.13         |                     | 0.53 ± 2.72                      | 1.42 ± 1.93         |                     |
| p-value             | 0.15                 | 0.61               | 0.05                |                     | 1.00                 | 0.22               | 0.87                |                     | 0.29                             | 0.93                |                     |
| Total carbohydrates |                      |                    |                     |                     |                      |                    |                     |                     |                                  |                     |                     |
| Below median        | 5.9%                 | 38.6%              | 0.23 ± 2.49         | N/A                 | 14.7%                | 0.20 ± 2.42        | 0.66 ± 2.34         | N/A                 | 0.46 ± 2.10                      | 1.32 ± 2.16         | N/A                 |
| Above median        | 0.0%                 | 31.8%              | 0.33 ± 2.08         |                     | 14.7%                | 0.23 ± 2.65        | 0.74 ± 2.20         |                     | 2.10 ± 0.51                      | 1.51 ± 1.99         |                     |
| p-value             | 0.15                 | 0.50               | 0.04                |                     | 1.00                 | 0.45               | 0.53                |                     | 0.62                             | 0.38                |                     |
| Whole grains        |                      |                    |                     |                     |                      |                    |                     |                     |                                  |                     |                     |
| Below median        | 3.0%                 | 33.3%              | 0.25 ± 2.42         | N/A                 | 9.1%                 | 0.21 ± 2.56        | 0.68 ± 2.19         | N/A                 | 0.45 ± 2.26                      | 1.34 ± 2.07         | N/A                 |
| Above median        | 2.9%                 | 37.2%              | 0.30 ± 2.23         |                     | 20.0%                | 0.23 ± 2.52        | 0.72 ± 2.35         |                     | 0.52 ± 2.39                      | 1.48 ± 2.08         |                     |
| p-value             | 0.97                 | 0.70               | 0.32                |                     | 0.20                 | 0.61               | 0.75                |                     | 0.42                             | 0.53                |                     |
| Bran                |                      |                    |                     |                     |                      |                    |                     |                     |                                  |                     |                     |
| Below median        | N/A                  | 35.6%              | N/A                 | N/A                 | N/A                  | 0.21 ± 2.57        | N/A                 | N/A                 | 0.45 ± 2.26                      | N/A                 | N/A                 |
| Above median        |                      | 34.9%              |                     |                     |                      | 0.23 ± 2.51        |                     |                     | 0.52 ± 2.39                      |                     |                     |
| p-value             |                      | 0.95               |                     |                     |                      | 0.57               |                     |                     | 0.40                             |                     |                     |
| Cold cereal         |                      |                    |                     |                     |                      |                    |                     |                     |                                  |                     |                     |
| <1 time/day         | 2.3%                 | 35.3%              | 0.28 ± 2.35         | N/A                 | 11.6%                | 0.17 ± 2.15        | 0.71 ± 2.29         | N/A                 | 0.39 ± 1.77                      | 1.42 ± 2.12         | N/A                 |
| ≥1 time/day         | 7.1%                 | 35.2%              | 0.25 ± 2.14         |                     | 17.9%                | 0.25 ± 2.70        | 0.60 ± 2.07         |                     | 0.55 ± 2.60                      | 1.29 ± 1.57         |                     |
| p-value             | 0.32                 | 0.99               | 0.73                |                     | 0.46                 | 0.06               | 0.55                |                     | 0.06                             | 0.70                |                     |
| Hot cereal          |                      |                    |                     |                     |                      |                    |                     |                     |                                  |                     |                     |
| <1 time/week        | 3.5%                 | 37.3%              | 0.25 ± 2.38         | N/A                 | 10.3%                | 0.22 ± 2.45        | 0.68 ± 2.23         | N/A                 | 0.50 ± 2.34                      | 1.32 ± 2.11         | N/A                 |
| ≥1 time/week        | 4.8%                 | 31.0%              | 0.40 ± 1.91         |                     | 16.7%                | 0.21 ± 2.75        | 0.78 ± 2.40         |                     | 0.46 ± 2.30                      | 1.76 ± 1.86         |                     |

|               |      |       |             |     |       |             |             |     |             |             |     |
|---------------|------|-------|-------------|-----|-------|-------------|-------------|-----|-------------|-------------|-----|
| p-value       | 0.79 | 0.56  | 0.02        |     | 0.45  | 0.79        | 0.48        |     | 0.67        | 0.10        |     |
| Bread         |      |       |             |     |       |             |             |     |             |             |     |
| ≤1 time/week  | 0.0% | 36.4% | 0.25 ± 2.41 | N/A | 21.7% | 0.21 ± 2.75 | 0.69 ± 2.22 | N/A | 0.49 ± 2.41 | 1.34 ± 2.11 | N/A |
| >1 time/week  | 6.4% | 34.9% | 0.36 ± 1.93 |     | 10.6% | 0.22 ± 2.47 | 0.74 ± 2.45 |     | 0.49 ± 2.30 | 1.64 ± 1.91 |     |
| p-value       | 0.22 | 0.90  | 0.10        |     | 0.21  | 0.91        | 0.73        |     | 1.00        | 0.26        |     |
| Tortillas     |      |       |             |     |       |             |             |     |             |             |     |
| <1 time/day   | 0.0% | 43.6% | N/A         | N/A | 14.3% | 0.21 ± 2.48 | N/A         | N/A | 0.47 ± 2.14 | N/A         | N/A |
| ≥1 time/day   | 4.7% | 28.6% |             |     | 14.1% | 0.23 ± 2.58 |             |     | 0.49 ± 2.48 |             |     |
| p-value       | 0.56 | 0.14  |             |     | 0.99  | 0.71        |             |     | 0.81        |             |     |
| Legumes       |      |       |             |     |       |             |             |     |             |             |     |
| ≤4 times/week | 2.6% | 36.5% | 0.28 ± 2.23 | N/A | 10.3% | 0.21 ± 2.24 | 0.75 ± 2.16 | N/A | 0.46 ± 2.03 | 1.50 ± 1.95 | N/A |
| >4 times/week | 6.3% | 33.3% | 0.27 ± 2.49 |     | 18.8% | 0.23 ± 2.97 | 0.62 ± 2.42 |     | 0.52 ± 2.75 | 1.28 ± 2.25 |     |
| p-value       | 0.44 | 0.76  | 0.87        |     | 0.31  | 0.77        | 0.28        |     | 0.48        | 0.29        |     |
| Fruit         |      |       |             |     |       |             |             |     |             |             |     |
| Below median  | 5.9% | N/A   | 0.24 ± 2.47 | N/A | 23.5% | N/A         | 0.67 ± 2.14 | N/A | N/A         | 1.31 ± 2.06 | N/A |
| Above median  | 0.0% |       | 0.32 ± 2.12 |     | 5.9%  |             | 0.72 ± 2.40 |     |             | 1.52 ± 2.08 |     |
| p-value       | 0.15 |       | 0.07        |     | 0.04  |             | 0.67        |     |             | 0.33        |     |
| Vegetables    |      |       |             |     |       |             |             |     |             |             |     |
| Below median  | 3.0% | N/A   | 0.24 ± 2.43 | N/A | 9.1%  | N/A         | 0.67 ± 2.17 | N/A | N/A         | 1.30 ± 2.06 | N/A |
| Above median  | 2.9% |       | 0.32 ± 2.18 |     | 20.0% |             | 0.72 ± 2.37 |     |             | 1.52 ± 2.08 |     |
| p-value       | 0.97 |       | 0.08        |     | 0.20  |             | 0.67        |     |             | 0.31        |     |

\*Calculated using the formula: [Glyphosate + (1.5 x AMPA)].

**Supplemental Table 5.** Agricultural use of glyphosate in Monterey County, California, 2000-2018.

| <b>Year</b> | <b>Total glyphosate use (kg)</b> |
|-------------|----------------------------------|
| 2000        | 60,844                           |
| 2002        | 56,208                           |
| 2004        | 56,483                           |
| 2006        | 55,776                           |
| 2008        | 53,111                           |
| 2010        | 59,983                           |
| 2012        | 67,338                           |
| 2014        | 77,102                           |
| 2016        | 102,142                          |
| 2018        | 102,780                          |

Source: CDPR. Pesticide Use Reporting (PUR). Published 2022. <https://www.cdpr.ca.gov/docs/pur/purmain.htm>.

**Supplemental Table 6.** Unadjusted<sup>a</sup> RRs and 95% CI for two-fold increases in child urinary glyphosate, AMPA, and glyphosate residue concentrations (specific gravity-corrected, µg/L) and abnormal markers of liver inflammation and metabolic syndrome (and its components) in CHAMACOS young adults in case-control group.

| Outcome                      | Glyphosate              |                                    | AMPA                 |                         |                                    | Glyphosate residues <sup>a</sup> |                                    |
|------------------------------|-------------------------|------------------------------------|----------------------|-------------------------|------------------------------------|----------------------------------|------------------------------------|
|                              | 14 years<br>(n=103-104) | 18 years <sup>b</sup><br>(n=72-73) | 5 years<br>(n=90-91) | 14 years<br>(n=104-105) | 18 years <sup>b</sup><br>(n=72-73) | 14 years<br>(n=103-104)          | 18 years <sup>b</sup><br>(n=72-73) |
| Elevated liver transaminases | 1.05 (0.88, 1.26)       | 1.04 (0.91, 1.20)                  | 1.28 (1.08, 1.51)    | 1.09 (0.92, 1.30)       | 1.11 (0.96, 1.29)                  | 1.07 (0.88, 1.31)                | 1.11 (0.95, 1.29)                  |
| Metabolic syndrome           | 1.19 (0.77, 1.82)       | 1.02 (0.54, 1.94)                  | 1.73 (1.09, 2.75)    | 1.60 (1.07, 2.40)       | 1.40 (0.79, 2.47)                  | 1.63 (1.01, 2.65)                | 1.31 (0.67, 2.55)                  |
| High blood pressure          | 1.27 (0.87, 1.85)       | 0.92 (0.64, 1.31)                  | 1.09 (0.78, 1.52)    | 1.47 (0.96, 2.25)       | 1.03 (0.68, 1.56)                  | 1.51 (0.92, 2.48)                | 0.99 (0.65, 1.52)                  |
| Large waist circumference    | 0.85 (0.68, 1.06)       | 1.06 (0.82, 1.37)                  | 1.11 (0.84, 1.45)    | 1.06 (0.78, 1.44)       | 1.12 (0.82, 1.52)                  | 0.97 (0.66, 1.42)                | 1.14 (0.83, 1.56)                  |
| High glucose                 | 0.99 (0.70, 1.41)       | 0.71 (0.30, 1.70)                  | 1.41 (0.71, 2.81)    | 1.37 (0.87, 2.14)       | 0.89 (0.41, 1.92)                  | 1.31 (0.76, 2.25)                | 0.71 (0.23, 2.20)                  |
| High triglycerides           | 1.07 (0.80, 1.44)       | 1.17 (0.75, 1.82)                  | 1.31 (0.65, 2.64)    | 1.44 (1.05, 1.97)       | 1.41 (1.00, 1.99)                  | 1.40 (0.97, 2.02)                | 1.38 (0.94, 2.03)                  |
| Low HDL cholesterol          | 0.87 (0.71, 1.06)       | 1.10 (0.88, 1.37)                  | 0.96 (0.76, 1.20)    | 1.11 (0.88, 1.41)       | 1.12 (0.90, 1.40)                  | 1.04 (0.78, 1.40)                | 1.14 (0.90, 1.43)                  |

<sup>a</sup>Calculated using the formula: [Glyphosate + (1.5 x AMPA)].

<sup>b</sup>Limited to participants with non-fasting urine samples.

**Supplemental Table 7.** Adjusted<sup>a</sup> RRs and 95% CI for two-fold increases in child urinary glyphosate, AMPA, and glyphosate residue concentrations (specific gravity-corrected, µg/L) at 18 years and abnormal markers of liver inflammation and metabolic syndrome (and its components) in CHAMACOS young adults in case-control group (n=120-121).

| <b>Outcome</b>               | <b>Glyphosate</b> | <b>AMPA</b>       | <b>Glyphosate residues<sup>b</sup></b> |
|------------------------------|-------------------|-------------------|----------------------------------------|
| Elevated liver transaminases | 1.02 (0.91, 1.15) | 1.07 (0.95, 1.22) | 1.08 (0.95, 1.23)                      |
| Metabolic syndrome           | 0.94 (0.62, 1.43) | 1.22 (0.83, 1.79) | 1.16 (0.76, 1.76)                      |
| High blood pressure          | 0.89 (0.65, 1.22) | 1.21 (0.87, 1.67) | 1.12 (0.81, 1.55)                      |
| Large waist circumference    | 0.91 (0.74, 1.13) | 1.02 (0.80, 1.31) | 0.98 (0.75, 1.27)                      |
| High glucose                 | 1.01 (0.56, 1.83) | 1.02 (0.66, 1.57) | 1.08 (0.65, 1.79)                      |
| High triglycerides           | 1.14 (0.88, 1.47) | 1.48 (1.08, 2.03) | 1.39 (1.03, 1.88)                      |
| Low HDL cholesterol          | 0.97 (0.79, 1.18) | 1.03 (0.83, 1.27) | 0.99 (0.78, 1.26)                      |

<sup>a</sup>Models adjusted for sex, any alcohol consumption at 18 years (yes/no), maternal pre-pregnancy BMI, parental work in agriculture during pregnancy (yes/no), household poverty status at 18 years (above vs below the poverty threshold), food security at 18 years (high/marginal security vs low and very low security).

<sup>b</sup>Calculated using the formula: [Glyphosate + (1.5 x AMPA)].

**Supplemental Table 8.** Adjusted<sup>a</sup> RRs and 95% CI for two-fold increases in child urinary glyphosate, AMPA, and glyphosate residue concentrations (specific gravity-corrected, µg/L) and abnormal liver enzymes and metabolic syndrome (and its components) in CHAMACOS young adults in the case-control group, excluding those cases with actin smooth muscle antibody or ceruloplasmin outside of normal limits, or who reported binge drinking in the past 30 days.<sup>b</sup>

| Outcome                      | Glyphosate            |                       | AMPA                 |                       |                       | Glyphosate residue <sup>c</sup> |                       |
|------------------------------|-----------------------|-----------------------|----------------------|-----------------------|-----------------------|---------------------------------|-----------------------|
|                              | 14 years<br>(n=97-98) | 18 years<br>(n=65-66) | 5 years<br>(n=87-88) | 14 years<br>(n=98-99) | 18 years<br>(n=65-66) | 14 years<br>(n=97-98)           | 18 years<br>(n=65-66) |
| Elevated liver transaminases | 1.04 (0.86, 1.25)     | 1.11 (0.93, 1.34)     | 1.26 (1.04, 1.53)    | 1.17 (0.96, 1.43)     | 1.14 (0.94, 1.38)     | 1.15 (0.91, 1.44)               | 1.17 (0.95, 1.44)     |
| Metabolic syndrome           | 1.23 (0.77, 1.97)     | 1.03 (0.61, 1.74)     | 2.15 (1.40, 3.29)    | 1.78 (1.11, 2.87)     | 1.30 (0.78, 2.17)     | 1.86 (1.04, 3.33)               | 1.24 (0.69, 2.23)     |
| High blood pressure          | 1.34 (0.81, 2.20)     | 1.06 (0.75, 1.50)     | 1.41 (0.82, 2.40)    | 1.47 (0.92, 2.37)     | 1.29 (0.81, 2.04)     | 1.55 (0.88, 2.73)               | 1.25 (0.83, 1.89)     |
| Large waist circumference    | 0.88 (0.71, 1.09)     | 1.12 (0.83, 1.52)     | 1.11 (0.88, 1.40)    | 1.15 (0.87, 1.52)     | 1.21 (0.89, 1.64)     | 1.06 (0.74, 1.51)               | 1.27 (0.92, 1.75)     |
| High glucose                 | 0.97 (0.58, 1.64)     | 1.96 (0.37, 10.46)    | 4.18 (2.35, 7.41)    | 1.60 (0.92, 2.79)     | 8.70 (1.01, 75.22)    | 1.54 (0.76, 3.09)               | 3.75 (1.03, 13.70)    |
| High triglycerides           | 0.96 (0.70, 1.32)     | 1.25 (0.83, 1.90)     | 1.39 (0.81, 2.38)    | 1.51 (1.03, 2.20)     | 1.70 (1.03, 2.79)     | 1.40 (0.91, 2.17)               | 1.70 (1.01, 2.86)     |
| Low HDL cholesterol          | 0.85 (0.69, 1.04)     | 1.13 (0.88, 1.43)     | 0.89 (0.71, 1.12)    | 1.19 (0.96, 1.49)     | 1.16 (0.86, 1.56)     | 1.10 (0.83, 1.45)               | 1.20 (0.88, 1.63)     |

<sup>a</sup>Models adjusted for sex, any alcohol consumption at 18 years (yes/no), maternal pre-pregnancy BMI, parental work in agriculture during pregnancy (yes/no), household poverty status at time of visit (above vs below the poverty threshold), food security at time of visit (high/marginal security vs low and very low security).

<sup>b</sup>Low ceruloplasmin: n=1, high actin: n=3, binge drinking in last 30 days: n=5; total exclusions: n=8 (one participant had high actin and had binge drinking).

<sup>c</sup>Calculated using the formula: [Glyphosate + (1.5 x AMPA)].



**Supplementary Table 9.** Overall p-values for visit X exposure interaction terms in multiple informant models for repeated child urinary glyphosate, AMPA, and glyphosate residue concentrations (specific gravity-corrected,  $\mu\text{g/L}$ ) at the 5-year, 14-year, and 18-year visits and abnormal markers of liver inflammation and metabolic syndrome (and its components), using mixed-effects Poisson models with a random intercept for each CHAMACOS participant.<sup>a,b</sup>

|                              | <b>Glyphosate<br/>(n=121-122)</b> | <b>AMPA<br/>(n=121-122)</b> | <b>Glyphosate residues<sup>c</sup> (n=121-122)</b> |
|------------------------------|-----------------------------------|-----------------------------|----------------------------------------------------|
| Elevated liver transaminases | 0.78                              | 0.67                        | 0.77                                               |
| Metabolic syndrome           | 0.91                              | 0.58                        | 0.67                                               |
| High blood pressure          | 0.42                              | 0.66                        | 0.56                                               |
| Large waist circumference    | 0.13                              | 0.98                        | 0.85                                               |
| High glucose                 | 0.51                              | 0.46                        | 0.52                                               |
| High triglycerides           | 0.11                              | 0.56                        | 0.62                                               |
| Low HDL cholesterol          | 0.38                              | 0.20                        | 0.30                                               |

<sup>a</sup>Fasting urine samples taken at 18 years are not included in models, but 5-year and 14-year samples are still included for those participants.

<sup>b</sup>Models adjusted for sex, any alcohol consumption at 18 years (yes/no), maternal pre-pregnancy BMI, parental work in agriculture during pregnancy (yes/no), household poverty status at 18 years (above vs below the poverty threshold), food security at 18 years (high/marginal security vs low and very low security).

<sup>c</sup>Calculated using the formula: [Glyphosate + (1.5 x AMPA)].

**Supplemental Table 10.** Mediation analysis of child body mass (at age 14 years) on the adjusted associations (RR and 95% CI) for two-fold increases in child (ages 14 and 18 years) urinary concentrations (specific gravity-corrected) of **A.** AMPA and **B.** glyphosate residues and abnormal liver enzymes and metabolic syndrome (and its components) in CHAMACOS young adult cases and controls.

**A. AMPA**

| Outcome                      | AMPA at 14 years                   |                                      |                                   | AMPA at 18 years (non-fasting samples only) |                                      |                                   |
|------------------------------|------------------------------------|--------------------------------------|-----------------------------------|---------------------------------------------|--------------------------------------|-----------------------------------|
|                              | Direct<br>RR (95% CI) <sup>a</sup> | Indirect<br>RR (95% CI) <sup>a</sup> | Total<br>RR (95% CI) <sup>a</sup> | Direct<br>RR (95% CI) <sup>a</sup>          | Indirect<br>RR (95% CI) <sup>a</sup> | Total<br>RR (95% CI) <sup>a</sup> |
| Elevated liver transaminases | 1.16 (0.98, 1.38)                  | 1.02 (0.97, 1.06)                    | 1.18 (0.98, 1.42)                 | 1.15 (1.02, 1.31)                           | 0.99 (0.92, 1.07)                    | 1.15 (0.99, 1.33)                 |
| Metabolic syndrome           | 1.72 (0.88, 3.37)                  | 1.09 (0.97, 1.23)                    | 1.88 (0.97, 3.64)                 | 1.69 (1.17, 2.45)                           | 1.05 (0.80, 1.37)                    | 1.77 (1.14, 2.75)                 |
| High blood pressure          | 1.51 (0.98, 2.32)                  | 1.08 (0.96, 1.20)                    | 1.62 (1.03, 2.54)                 | 1.14 (0.75, 1.73)                           | 1.03 (0.88, 1.21)                    | 1.17 (0.75, 1.82)                 |
| Large waist circumference    | 1.07 (0.85, 1.37)                  | 1.07 (0.97, 1.18)                    | 1.15 (0.86, 1.54)                 | 1.24 (1.01, 1.51)                           | 1.03 (0.89, 1.19)                    | 1.27 (0.96, 1.68)                 |
| High glucose                 | 1.60 (0.90, 2.85)                  | 1.03 (0.97, 1.08)                    | 1.65 (0.92, 2.95)                 | NA                                          | NA                                   | NA                                |
| High triglycerides           | 1.46 (0.98, 2.18)                  | 1.03 (0.97, 1.10)                    | 1.51 (1.01, 2.24)                 | 1.38 (1.00, 1.92)                           | 1.02 (0.93, 1.11)                    | 1.41 (1.02, 1.94)                 |
| Low HDL cholesterol          | 1.15 (0.93, 1.43)                  | 1.02 (0.98, 1.07)                    | 1.18 (0.95, 1.46)                 | 1.15 (0.89, 1.48)                           | 1.00 (0.99, 1.01)                    | 1.15 (0.89, 1.48)                 |

**B. Glyphosate residues**

| Outcome                      | Glyphosate residues at 14 years    |                                      |                                   | Glyphosate residues at 18 years (non-fasting samples only) <sup>b</sup> |                                      |                                   |
|------------------------------|------------------------------------|--------------------------------------|-----------------------------------|-------------------------------------------------------------------------|--------------------------------------|-----------------------------------|
|                              | Direct<br>RR (95% CI) <sup>a</sup> | Indirect<br>RR (95% CI) <sup>a</sup> | Total<br>RR (95% CI) <sup>a</sup> | Direct<br>RR (95% CI) <sup>a</sup>                                      | Indirect<br>RR (95% CI) <sup>a</sup> | Total<br>RR (95% CI) <sup>a</sup> |
| Elevated liver transaminases | 1.16 (0.96, 1.40)                  | 1.00 (0.96, 1.05)                    | 1.16 (0.95, 1.42)                 | 1.18 (1.04, 1.34)                                                       | 0.99 (0.91, 1.08)                    | 1.17 (1.00, 1.37)                 |
| Metabolic syndrome           | 1.82 (0.87, 3.83)                  | 1.03 (0.91, 1.17)                    | 1.89 (0.90, 3.94)                 | 1.58 (1.07, 2.34)                                                       | 1.00 (0.75, 1.34)                    | 1.58 (0.98, 2.56)                 |
| High blood pressure          | 1.60 (0.98, 2.63)                  | 1.03 (0.92, 1.15)                    | 1.65 (0.99, 2.74)                 | 1.07 (0.69, 1.66)                                                       | 1.00 (0.84, 1.20)                    | 1.07 (0.67, 1.71)                 |
| Large waist circumference    | 1.02 (0.77, 1.36)                  | 1.03 (0.93, 1.14)                    | 1.05 (0.75, 1.48)                 | 1.31 (1.07, 1.60)                                                       | 1.00 (0.85, 1.18)                    | 1.31 (0.98, 1.74)                 |
| High glucose                 | 1.53 (0.76, 3.08)                  | 1.01 (0.97, 1.06)                    | 1.55 (0.76, 3.13)                 | NA                                                                      | NA                                   | NA                                |
| High triglycerides           | 1.36 (0.87, 2.13)                  | 1.01 (0.96, 1.07)                    | 1.38 (0.89, 2.16)                 | 1.33 (0.96, 1.83)                                                       | 1.00 (0.91, 1.10)                    | 1.33 (0.97, 1.82)                 |
| Low HDL cholesterol          | 1.08 (0.84, 1.38)                  | 1.01 (0.97, 1.05)                    | 1.09 (0.84, 1.41)                 | 1.20 (0.93, 1.54)                                                       | 1.00 (1.00, 1.00)                    | 1.20 (0.93, 1.54)                 |

<sup>a</sup>Models adjusted for sex, any alcohol consumption at 18 years (yes/no), maternal pre-pregnancy BMI, parental work in agriculture during pregnancy (yes/no), household poverty status at time of visit (above vs below the poverty threshold), food security at time of visit (high/marginal security vs low and very low security).

<sup>b</sup>Calculated using the formula: [Glyphosate + (1.5 x AMPA)].

**Supplemental Table 11.** Unadjusted RRs and 95% CI for living within 1-km of agricultural glyphosate use during maternal pregnancy (any use) and from birth to age 5 years (all use, kg, log<sub>2</sub>) based on Pesticide Use Reporting data and abnormal liver enzymes or metabolic syndrome (and its components) among all CHAMACOS young adult participants and in the case-control subset.

| Outcome                      | Any PUR use near home residence during pregnancy<br>(yes/no) |                                | Sum of PUR use near home residence from birth to<br>age 5 years (log <sub>2</sub> ) |                                |
|------------------------------|--------------------------------------------------------------|--------------------------------|-------------------------------------------------------------------------------------|--------------------------------|
|                              | All 18-year participants<br>(n=408)                          | Case-control subset<br>(n=150) | All 18-year participants<br>(n=329)                                                 | Case-control subset<br>(n=130) |
| Elevated liver transaminases | 0.88 (0.55, 1.40)                                            | 1.12 (0.75, 1.67)              | 0.96 (0.82, 1.12)                                                                   | 0.99 (0.87, 1.13)              |
| Metabolic syndrome           | 1.09 (0.61, 1.93)                                            | 3.12 (1.08, 9.01)              | 1.12 (0.94, 1.33)                                                                   | 1.55 (1.13, 2.14)              |
| High blood pressure          | 1.04 (0.62, 1.75)                                            | 1.11 (0.44, 2.80)              | 1.00 (0.83, 1.22)                                                                   | 1.18 (0.88, 1.57)              |
| Large waist circumference    | 1.02 (0.81, 1.28)                                            | 1.08 (0.64, 1.83)              | 1.04 (0.96, 1.12)                                                                   | 0.96 (0.80, 1.14)              |
| High glucose                 | 0.73 (0.30, 1.77)                                            | 0.42 (0.12, 1.53)              | 0.86 (0.66, 1.12)                                                                   | 0.83 (0.60, 1.15)              |
| High triglycerides           | 1.00 (0.59, 1.70)                                            | 3.04 (1.14, 8.10)              | 1.09 (0.90, 1.32)                                                                   | 1.49 (1.06, 2.09)              |
| Low HDL cholesterol          | 0.99 (0.77, 1.27)                                            | 1.05 (0.63, 1.75)              | 0.98 (0.90, 1.07)                                                                   | 0.92 (0.77, 1.10)              |

**Supplemental Figure 1.** Flow diagram of participants from the CHAMACOS study.

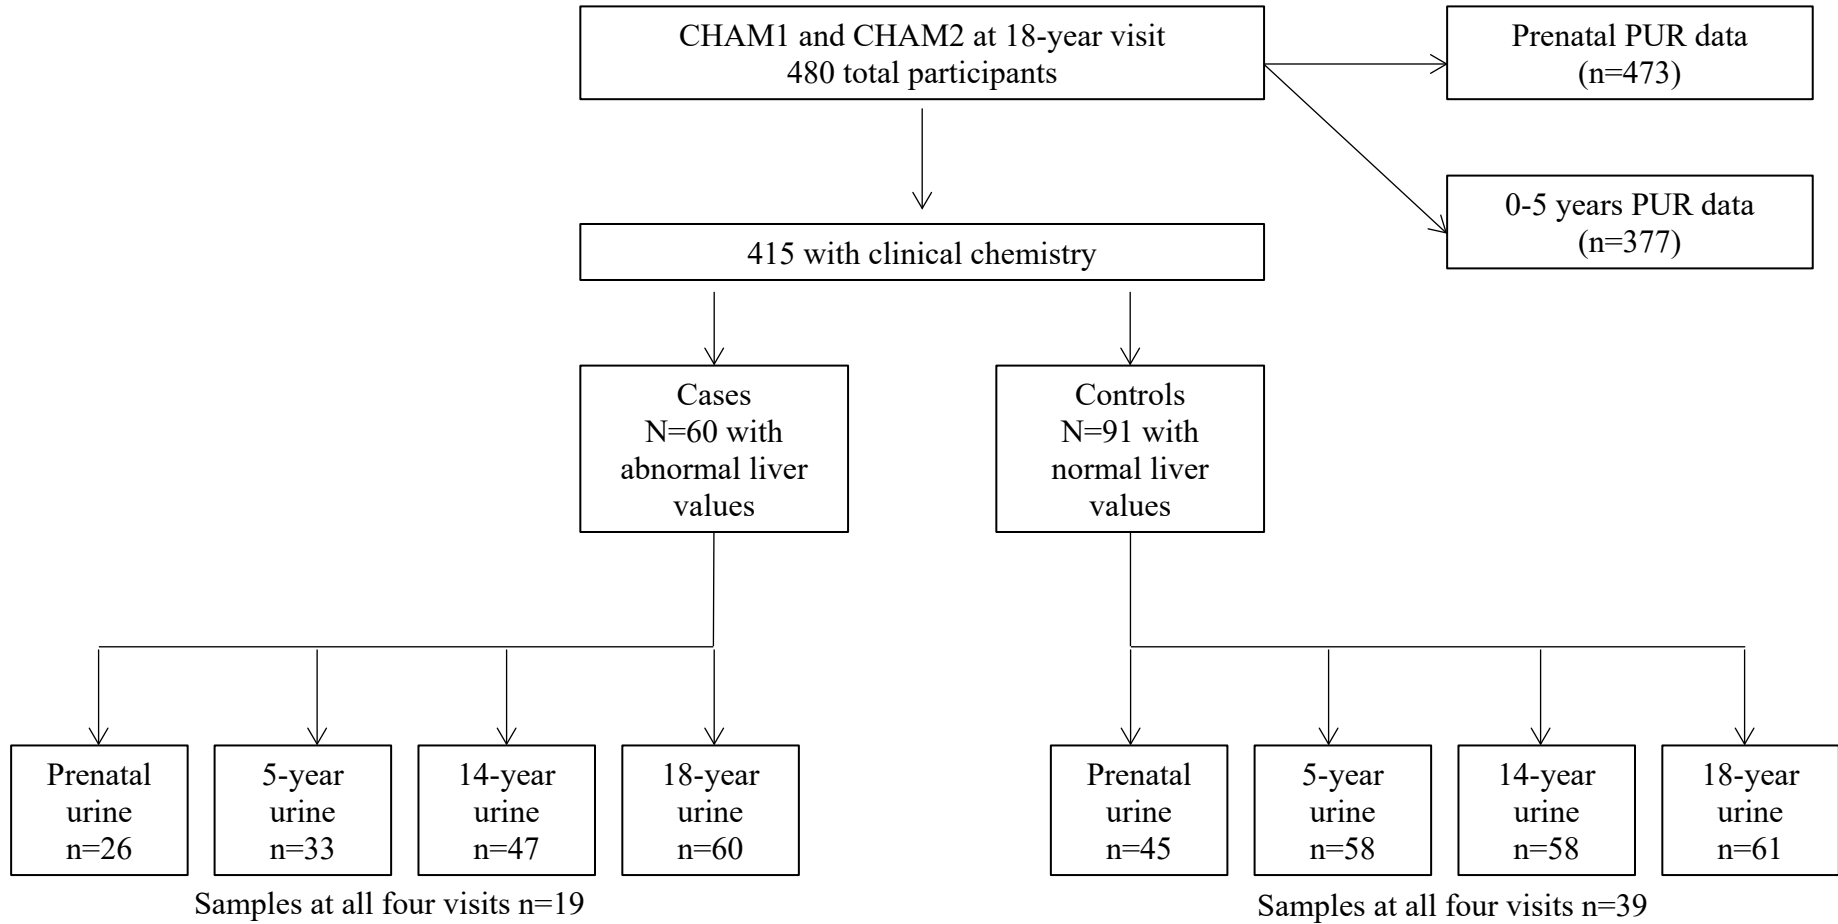

**Supplemental Figure 2.** Directed Acyclic Graph of the relationship between urinary glyphosate and AMPA concentrations and risk of elevated liver transaminases and metabolic syndrome (and its components).

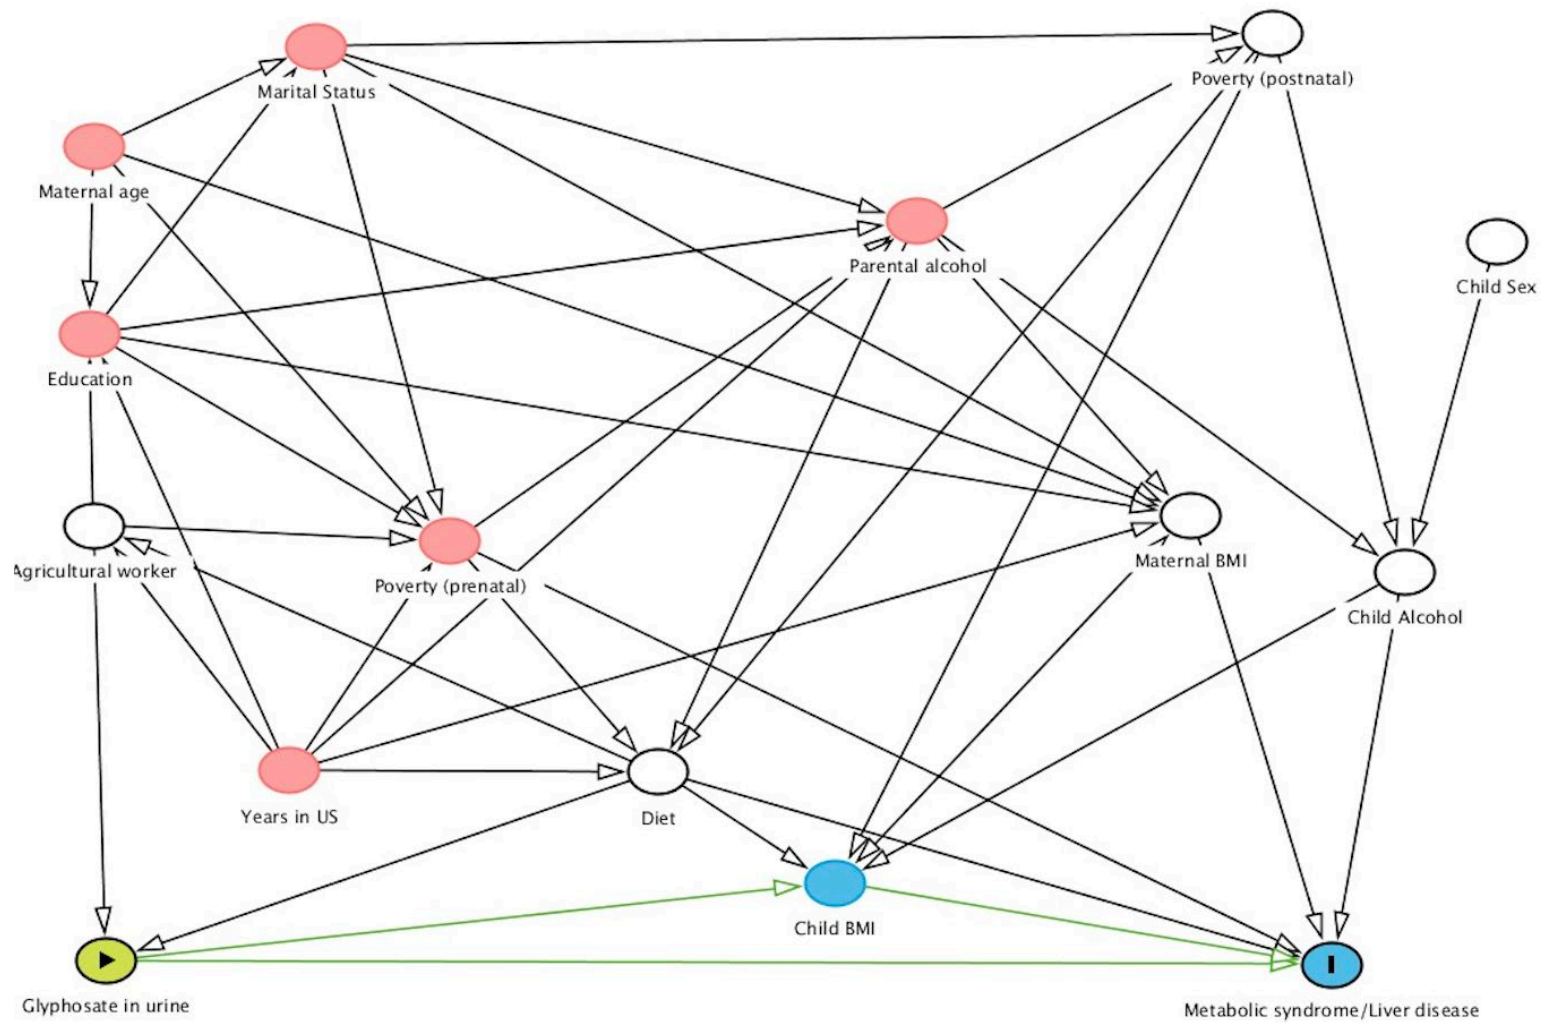

**Supplemental Material.** Certificates of INSPQ's participation in the Quebec External Quality Assessment Scheme for Organic Substances in Urine (OSEQAS), German External Quality Assessment Scheme (G-EQUAS), and Human Biomonitoring for Europe (HBM4EU, reference laboratory) program.

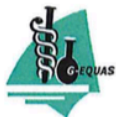

German External Quality Assessment Scheme

**Intercomparison programme 68, 2021**  
for toxicological analyses in biological materials

**Prof. Dr. med. H. Drexler**

on behalf of the German Society for Occupational and Environmental Medicine .e.V

Henkestr. 9-11, D-91054 Erlangen

External Quality Control acc. to the Guidelines of the German Federal Medical Council

Participant: Eric Gaudreau 273  
Centre de toxicologie - INSPQ  
945, Avenue Wolfe, 4ieme etage  
G1V 5B3 Quebec, Quebec  
Canada

## Certificate

valid until January 31, 2023

This is to certify you participated in the intercomparison programme 68 / 2021 for occupational / environmental medical - toxicological analyses. In accordance with the guidelines issued by the German Federal Medical Council (Bundesärztekammer) of September 19th, 2014 on implementation of intercomparison programmes in the medical field you have fulfilled the requirements for the following parameters:

### Environmental medical field

1-HP in urine  
trans-C12-CA in urine  
p,p'-DDE in serum  
beta-HCH in serum  
PCB-101 in serum  
PCB-180 in serum  
DMTP in urine  
DEDTP in urine  
5-carboxy-MEPP in urine  
PFOS in serum  
MnBP in urine  
Bisphenol A in urine  
TCS in urine

Br2-CA in urine  
Cotinine in urine  
DDT in serum  
gamma-HCH in serum  
PCB-138 in serum  
DMP in urine  
DEP in urine  
5-OH-MEHP in urine  
MEHP in urine  
1-Naphthol in urine  
MiBP in urine  
3-PBA in urine  
Glyphosat in urine

cis-C12-CA in urine  
Nicotine in urine  
HCB in serum  
PCB-28 in serum  
PCB-153 in serum  
DMTP in urine  
DETP in urine  
5-oxo-MEHP in urine  
PFOA in serum  
2-Naphthol in urine  
MBzP in urine  
FPBA in urine

Erlangen, 2022/01/11

Prof. Dr. med. H. Drexler

Prof. Dr. rer. nat. Th. Göen

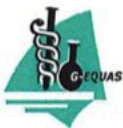

German External Quality Assessment Scheme

**Intercomparison programme 69, 2022  
for toxicological analyses in biological materials**

**Prof. Dr. med. H. Drexler**

**on behalf of the German Society for Occupational and Environmental Medicine .e.V**

Henkestr. 9-11, D-91054 Erlangen

External Quality Control acc. to the Guidelines of the German Federal Medical Council

Participant: Eric Gaudreau  
Centre de toxicologie - INSPQ  
945, Avenue Wolfe, 4ieme etage  
G1V 5B3 Quebec, Quebec  
Canada

273

## Certificate

valid until July 31, 2023

This is to certify you participated in the intercomparison programme 69 / 2022 for occupational / environmental medical - toxicological analyses. In accordance with the guidelines issued by the German Federal Medical Council (Bundesärztekammer) of September 19th, 2014 on implementation of intercomparison programmes in the medical field you have fulfilled the requirements for the following parameters:

### Environmental medical field

PCP in urine  
cis-Cl2-CA in urine  
p,p'-DDE in serum  
alpha-HCH in serum  
PCB-28 in serum  
PCB-153 in serum  
5-carboxy-MEPP in urine  
1-Naphthol in urine  
MIBP in urine  
Trichloropyridinol in urine  
FPBA in urine

1-HP in urine  
trans-Cl2-CA in urine  
DDT in serum  
beta-HCH in serum  
PCB-101 in serum  
PCB-180 in serum  
PFOA in serum  
2-Naphthol in urine  
MBzP in urine  
Isopropoxyphenol in urine  
TCS in urine

Br2-CA in urine  
Cotinine in urine  
HCB in serum  
gamma-HCH in serum  
PCB-138 in serum  
5-oxo-MEHP in urine  
PFOS in serum  
MnBP in urine  
Bisphenol A in urine  
3-PBA in urine  
Glyphosat in urine

Erlangen, 2022/07/12

Prof. Dr. med. H. Drexler

Prof. Dr. rer. nat. Th. Göen

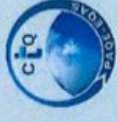

**Le secteur des programmes d'assurance  
qualité externes du CTQ/INSPOQ  
reconnaît la participation de**

## **CTQ 1**

**au programme OSEQAS pour 2020**

Alain LeBlanc  
Gestionnaire du programme

David Bisson  
Coordonnateur du programme



# Programmes d'assurance qualité externes du CTQ/INSPQ

## CTQ 1

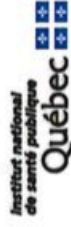

Direction de la santé environnementale et de la toxicologie

Ce certificat de performance inclut un sommaire annuel de performance au programme OSEQAS pour l'année 2020. Le score annuel a été calculé pour toutes les combinaisons d'analyte/matrice pour lesquelles des résultats ont été transmis au cours de l'année. Les résultats non numériques ont été exclus du calcul.

La note accordée (%) correspond au total des points accumulés sur un total maximum de 3 points par résultat. Le score est calculé selon le score Z' en valeur absolue :

3 points si  $0.0 < |\text{score } Z'| \leq 1.0$  ; 2 points si  $1.0 < |\text{score } Z'| \leq 2.0$  ; 1 point si  $2.0 < |\text{score } Z'| < 3.0$  ; 0 point si  $|\text{score } Z'| \geq 3.0$

Un score de 0% indique que tous les résultats transmis pour cet analyte/matrice ont reçu un  $|\text{score } Z'| \geq 3.0$ . Une absence de score indique qu'aucun résultat numérique n'a été transmis pour cet analyte/matrice.

Le seuil de passage est indiqué au bas du sommaire annuel de performance. Les scores sous le seuil de passage sont inscrits en rouge ou apparaissent sous la ligne du seuil de passage et indiquent une performance insatisfaisante. Nous vous remercions pour votre participation aux programmes d'assurance qualité externes du CTQ/INSPQ et sommes heureux de collaborer avec votre organisation. Pour toute information, n'hésitez pas à communiquer avec nous à [ctq@inspq.qc.ca](mailto:ctq@inspq.qc.ca). Il nous fera plaisir de vous assister.

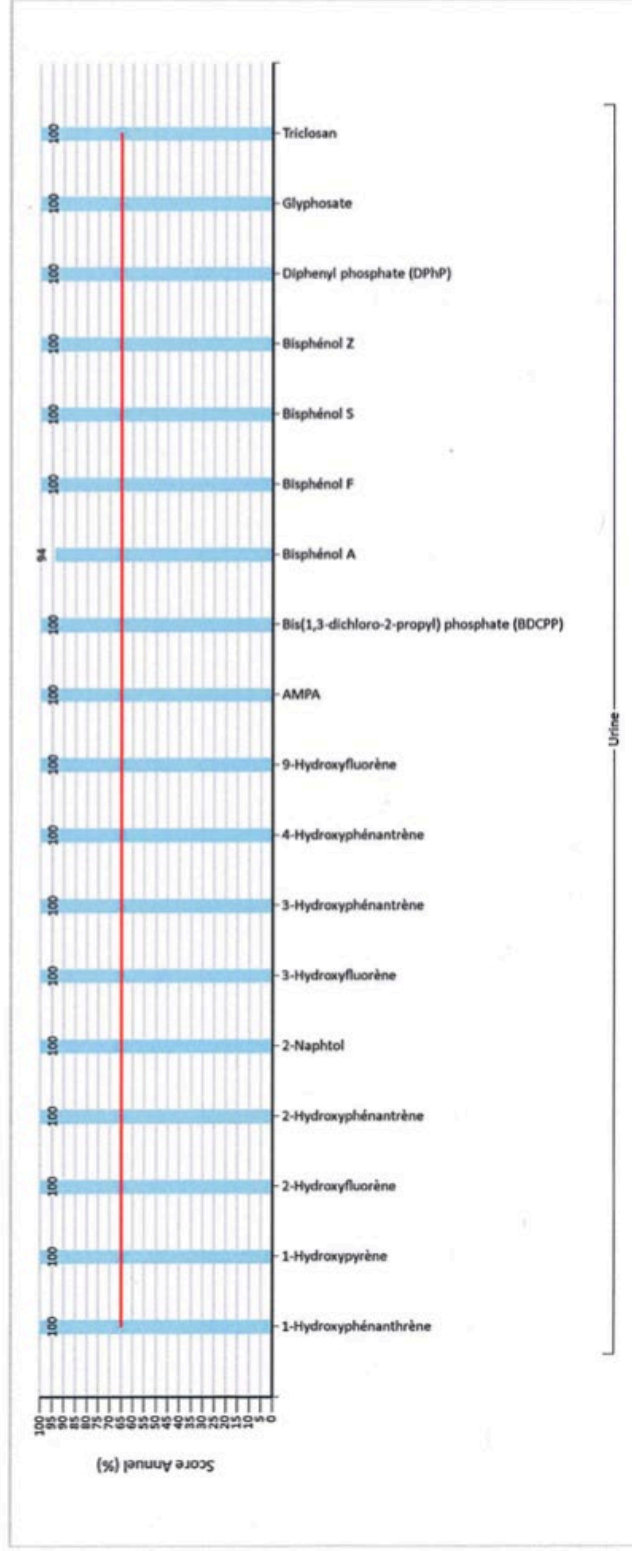

Urine

Seuil de passage : 65%

Imprimé le 2021-02-04

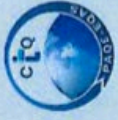

Le secteur des programmes d'assurance  
qualité externes du CTQ/INSPQ  
reconnait la participation de

## CTQ 1

au programme OSEQAS pour 2021

Alain LeBlanc  
Gestionnaire du programme

David Bisson  
Coordonnateur du programme

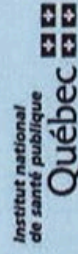

Direction de la santé environnementale  
et de la toxicologie

# Programmes d'assurance qualité externes du CTQ/INSPQ

## CTQ 1

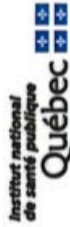

Direction de la santé environnementale  
et de la toxicologie

Ce certificat de performance inclut un sommaire annuel de performance au programme OSEQAS pour l'année 2021. Le score annuel a été calculé pour toutes les combinaisons d'analyte/matrice pour lesquelles des résultats ont été transmis au cours de l'année. Les résultats non numériques ont été exclus du calcul.

La note accordée (%) correspond au total des points accumulés sur un total maximum de 3 points par résultat. Le score est calculé selon le score Z' en valeur absolue :

$3 \text{ points si } 0.0 < |\text{score Z}'| \leq 1.0$  ;  $2 \text{ points si } 1.0 < |\text{score Z}'| \leq 2.0$  ;  $1 \text{ point si } 2.0 < |\text{score Z}'| < 3.0$  ;  $0 \text{ point si } |\text{score Z}'| \geq 3.0$

Un score de 0% indique que tous les résultats transmis pour cet analyte/matrice ont reçu un  $|\text{score Z}'| \geq 3.0$ . Une absence de score indique qu'aucun résultat numérique n'a été transmis pour cet analyte/matrice.

Le seuil de passage est indiqué au bas du sommaire annuel de performance. Les scores sous le seuil de passage sont inscrits en rouge ou apparaissent sous la ligne du seuil de passage et indiquent une performance insatisfaisante. Nous vous remercions pour votre participation aux programmes d'assurance qualité externes du CTQ/INSPQ et sommes heureux de collaborer avec votre organisation. Pour toute information, n'hésitez pas à communiquer avec nous à [ctq@inspq.qc.ca](mailto:ctq@inspq.qc.ca). Il nous fera plaisir de vous assister.

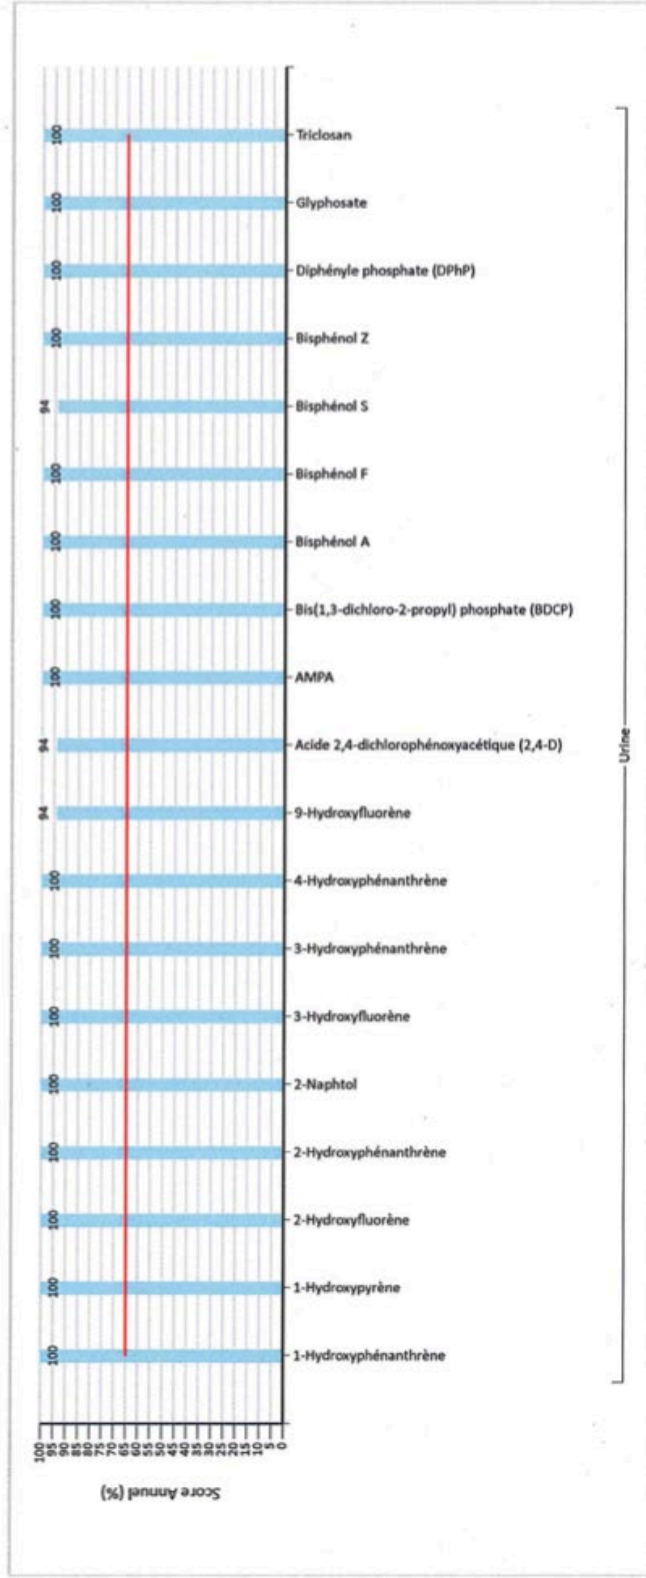

Seuil de passage : 65%

Imprimé le 2021-11-18
