# Supplementary material
Source: PubMed Central journal article supplement (PMC9976611)
Supplement: ehp11721.smcontents.508.pdf [file ehp11721.smcontents.508.pdf]

**Note to readers with disabilities:** *EHP* strives to ensure that all journal content is accessible to all readers. However, some figures and Supplemental Material published in *EHP* articles may not conform to [508 standards](#) due to the complexity of the information being presented. If you need assistance accessing journal content, please contact [ehp508@niehs.nih.gov](mailto:ehp508@niehs.nih.gov). Our staff will work with you to assess and meet your accessibility needs within 3 working days.

### **Supplemental Material**

#### **Association of Lifetime Exposure to Glyphosate and Aminomethylphosphonic Acid (AMPA) with Liver Inflammation and Metabolic Syndrome at Young Adulthood: Findings from the CHAMACOS Study**

Brenda Eskenazi, Robert B. Gunier, Stephen Rauch, Katherine Kogut, Emily R. Perito, Xenia Mendez, Charles Limbach, Nina Holland, Asa Bradman, Kim G. Harley, Paul J. Mills, and Ana M. Mora

#### **Table of Contents**

**Table S1.** Wet-weight, specific gravity-corrected, and creatinine-adjusted urinary glyphosate and AMPA concentrations in maternal urine at 26-weeks' gestation and child urine at 5-, 14-, and 18-year visits, CHAMACOS study participants.

**Table S2.** Chi-square tests for differences in detection frequencies of glyphosate and AMPA concentrations measured in urine samples collected from the mother during pregnancy and from the child at 5, 14, and 18 years, CHAMACOS participants in case-control group.

**Table S3.** Correlation matrix and p-values of maternal and child urinary concentrations of glyphosate and AMPA, and PUR data from birth to 5 years, CHAMACOS study.

**Table S4.** Associations of measures of food consumption with urinary glyphosate, AMPA, and glyphosate residue concentrations in maternal and child urine, CHAMACOS study.

**Table S5.** Agricultural use of glyphosate in Monterey County, California, 2000-2018.

**Table S6.** Unadjusted RRs and 95% CI for two-fold increases in child urinary glyphosate, AMPA, and glyphosate residue concentrations (specific gravity-corrected,  $\mu\text{g/L}$ ) and abnormal markers of liver inflammation and metabolic syndrome (and its components) in CHAMACOS young adults in case-control group.

**Table S7.** Adjusted RRs and 95% CI for two-fold increases in child urinary glyphosate, AMPA, and glyphosate residue concentrations (specific gravity-corrected,  $\mu\text{g/L}$ ) at 18 years and abnormal markers of liver inflammation and metabolic syndrome (and its components) in CHAMACOS young adults in case-control group (n=120-121).

**Table S8.** Adjusted RRs and 95% CI for two-fold increases in child urinary glyphosate, AMPA, and glyphosate residue concentrations (specific gravity-corrected,  $\mu\text{g/L}$ ) and abnormal liver enzymes and metabolic syndrome (and its components) in CHAMACOS young adults in the case-control group, excluding those cases with actin smooth muscle antibody or ceruloplasmin outside of normal limits, or who reported binge drinking in the past 30 days.

**Table S9.** Overall p-values for visit X exposure interaction terms in multiple informant models for repeated child urinary glyphosate, AMPA, and glyphosate residue concentrations (specific gravity-corrected,  $\mu\text{g/L}$ ) at the 5-year, 14-year, and 18-year visits and abnormal markers of liver inflammation and metabolic syndrome (and its components), using mixed-effects Poisson models with a random intercept for each CHAMACOS participant.

**Table S10.** Mediation analysis of child body mass (at age 14 years) on the adjusted associations (RR and 95% CI) for two-fold increases in child (ages 14 and 18 years) urinary concentrations (specific gravity-corrected) of **A.** AMPA and **B.** glyphosate residues and abnormal liver enzymes and metabolic syndrome (and its components) in CHAMACOS young adult cases and controls.

**Table S11.** Unadjusted RRs and 95% CI for living within 1-km of agricultural glyphosate use during maternal pregnancy (any use) and from birth to age 5 years (all use, kg,  $\log_2$ ) based on Pesticide Use Reporting data and abnormal liver enzymes or metabolic syndrome (and its components) among all CHAMACOS young adult participants and in the case-control subset.

**Figure S1.** Flow diagram of participants from the CHAMACOS study.

**Figure S2.** Directed Acyclic Graph of the relationship between urinary glyphosate and AMPA concentrations and risk of elevated liver transaminases and metabolic syndrome (and its components).

**Supplemental Material.** Certificates of INSPQ's participation in the Quebec External Quality Assessment Scheme for Organic Substances in Urine (OSEQAS), German External Quality Assessment Scheme (G-EQUAS), and Human Biomonitoring for Europe (HBM4EU, reference laboratory) program.
